# Supplementary material for: Hydrothermal routes to new sodium hydrogen polytungstates
Source: Royal Society of Chemistry journal article supplement (doi:10.1039/b818103a), 2009-01-01
Supplement: b818103a.pdf [file b818103a.pdf]

## Electronic Supplementary Information

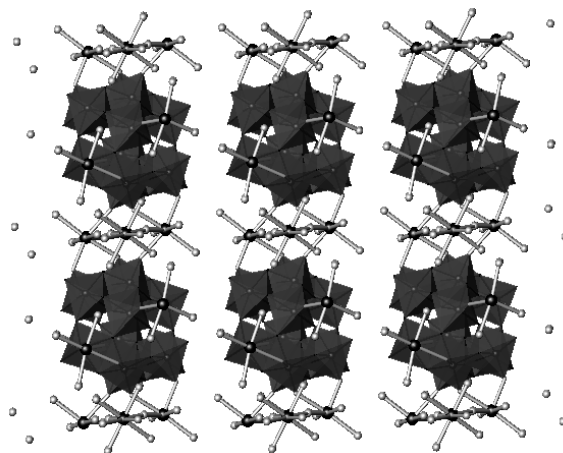

Figure 1-Structure of Na<sub>5</sub>[H<sub>7</sub>W<sub>12</sub>O<sub>42</sub>]·20H<sub>2</sub>O looking down the *c*-axis, where WO<sub>6</sub> are shown as grey polyhedra and sodium cations and oxygen atoms both as black spheres.

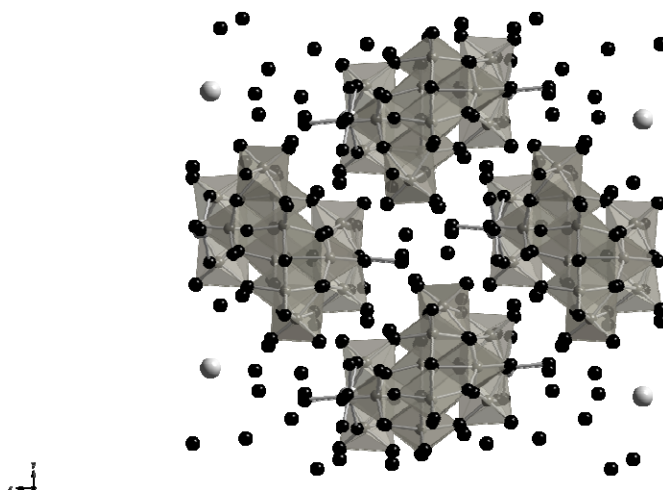

Figure 2-Structure of Na<sub>2</sub>[H<sub>10</sub>W<sub>12</sub>O<sub>42</sub>]·20H<sub>2</sub>O, looking down the *a*-axis, where WO<sub>6</sub> are shown as grey polyhedra and sodium cations and oxygen atoms both as black spheres.

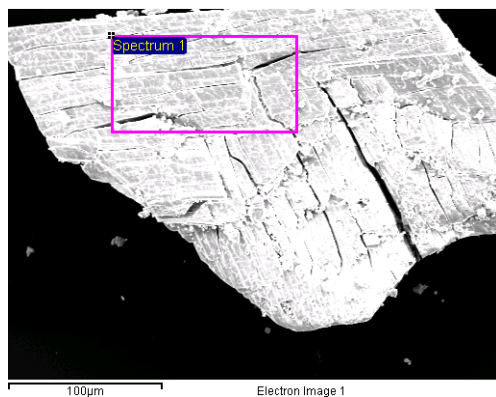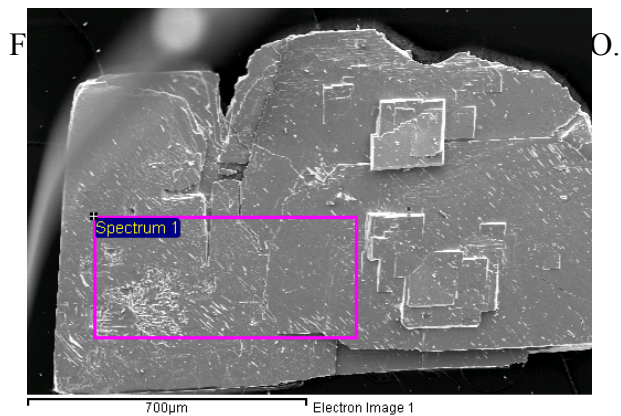

Figure 4-EDS image of  $\text{Na}_2[\text{H}_{10}\text{W}_{12}\text{O}_{42}] \cdot 20\text{H}_2\text{O}$ .
